# Supplementary material for: eIF3k inhibits NF-κB signaling by targeting MyD88 for ATG5-mediated autophagic degradation in teleost fish
Source: PubMed Central journal article supplement — J Biol Chem. 2022 Feb 15;298(3):101730. doi: 10.1016/j.jbc.2022.101730 (PMC8914388; doi:10.1016/j.jbc.2022.101730), 2022-02-15
Supplement: mmc1.pdf [file mmc1.pdf]

**Supplemental Table 1. PCR primer information in this study.**

| <b>Primers</b>             | <b>sequences (5'-3')</b>  |
|----------------------------|---------------------------|
| ATG5-F                     | ATGGCAGATGACAAGGACGTGT    |
| ATG5-R                     | CGGTGCGGTGGGCTCGG         |
| ATG5-qPCR-F                | GGACGTGGAGGAGATGTGG       |
| ATG5-qPCR-R                | AGGGTAAGACGGTGTTGGAG      |
| Beclin1-qPCR-F             | AACAAATTCGACCACGCCA       |
| Beclin1-qPCR-R             | GCCCTTCTCCACATCCATCC      |
| eIF3k-F                    | ATGTCGTCGTCTTTTCGAG       |
| eIF3k-R                    | GTGTATCACTGAGATGTGGC      |
| eIF3k-qPCR-F               | GTGGAGACACAAGCCAGAGAAAACG |
| eIF3k-qPCR-R               | GAGTGAAGTCGGTGTGTGGCAGG   |
| eIF3k-ΔHAM-F               | CAGATTCTGCTGAAGGCGCT      |
| eIF3k-ΔHAM-R               | CAGGAGCTTCCCCACGTT        |
| eIF3k-ΔWH-F                | GACACGCAGGTGAAGGTTTG      |
| eIF3k-ΔWH-R                | CTCCAGCAGGTTCCCCAG        |
| MyD88-qPCR-F               | ATGGTTAACAGACCGAGTA       |
| MyD88-qPCR-R               | TGAGGAAGCGTAAGATGC        |
| IL6-qPCR-F                 | GCGGTAAAGGCATGGATAT       |
| IL6-qPCR-R                 | GTTGTAGTTGGAAGGGCAG       |
| IL8-qPCR-F                 | AGCAGCAGAGTCTTCGT         |
| IL8-qPCR-R                 | TCTTCGCAGTGGGAGTT         |
| IRF3-qPCR-F                | GATGGGCGATGGTT            |
| IRF3-qPCR-R                | TGGGCTGTCTGCTACT          |
| ISG56-qPCR-F               | ATGATGGCGGCAAAGATAC       |
| ISG56-qPCR-R               | ACCTCCACCTCCACCAGTT       |
| LC3B-F                     | CGCGGACAGCGACTTTGA        |
| LC3B-R                     | GTTCACTGGGCGGTCACG        |
| LC3B-qPCR-F                | CGCGGACAGCGACTTTGA        |
| LC3B-qPCR-R                | GTTCACTGGGCGGTCACG        |
| MX1-qPCR-F                 | GCTGCTTGTTTACTCCCA        |
| MX1-qPCR-R                 | ACCTGCATCATCTCCCTC        |
| Nrdp1-F                    | CGTGGCTCCCAGTGATGTA       |
| Nrdp1-R                    | AACGTCCCCACTTGTCTCTG      |
| TNF $\alpha$ -qPCR-F       | GTTTGCTTGGTACTGGAATGG     |
| TNF $\alpha$ -qPCR-R       | TGTGGGATGATGATCTGGTTG     |
| ULK1-qPCR-F                | CCACCTCTCACCTCGCCT        |
| ULK1-qPCR-R                | AGTTCTTGCTGCTGCCGC        |
| $\beta$ -actin-qPCR-F      | GAGCCGCACGCTTCTTT         |
| $\beta$ -actin-qPCR-R      | CTGCTGTAGCCGAGGAC         |
| EPC-IL-1 $\beta$ -qPCR-F   | ATGCGACATGCATGACATCA      |
| EPC-IL-1 $\beta$ -qPCR-R   | CATCACAAAACCTGCCAGAAG     |
| EPC- $\beta$ -actin-qPCR-R | TTGAAGGATGGGGAAAACA       |
| EPC- $\beta$ -actin-qPCR-F | CAGAACACAACCGCTAATGG      |
