# Supplementary material for: eIF3k inhibits NF-κB signaling by targeting MyD88 for ATG5-mediated autophagic degradation in teleost fish
Source: PubMed Central journal article supplement — J Biol Chem. 2022 Feb 15;298(3):101730. doi: 10.1016/j.jbc.2022.101730 (PMC8914388; doi:10.1016/j.jbc.2022.101730), 2022-02-15
Supplement: mmc2.pdf [file mmc2.pdf]

Supplemental Table 2. The dates of mass spectrum analysis

| Protein IDs  | Protein names                                                                 | Gene names   | Peptides | Unique peptides | Intensity (10 <sup>6</sup> ) |
|--------------|-------------------------------------------------------------------------------|--------------|----------|-----------------|------------------------------|
| Q6IT78       | Calmodulin                                                                    | calm1a       | 9        | 9               | 1242.9                       |
| F1QI59       | Serine/threonine-protein phosphatase                                          | ppp1cb       | 8        | 1               | 2808.2                       |
| Q58P23       | ATP synthase subunit alpha                                                    | atp5a1       | 8        | 8               | 1187.8                       |
| Q7ZVJ4       | L-lactate dehydrogenase A chain                                               | ldha         | 6        | 1               | 41.602                       |
| Q803D7       | Protein disulfide-isomerase                                                   | pdia3        | 5        | 5               | 286.84                       |
| Q804G9       | Annexin                                                                       | anxa2a       | 5        | 5               | 165.85                       |
| Q6DRK5       | Coatomer subunit alpha                                                        | copa         | 5        | 5               | 17.535                       |
| Q08C47       | Fascin                                                                        | fscn1a       | 5        | 5               | 106.53                       |
| Z4YIS0       | Protein phosphatase 1 regulatory subunit 12A                                  | ppp1r12a     | 5        | 5               | 83.049                       |
| Q6PC12       | Enolase                                                                       | eno1a        | 4        | 4               | 125.16                       |
| Q90275       | Cadherin-2                                                                    | cdh2         | 4        | 4               | 18.761                       |
| A7E2L4       | Guanine nucleotide-binding protein subunit beta-2-like 1                      | gnb2l1       | 4        | 4               | 113.7                        |
| D6R704       | Fructose-bisphosphate aldolase C-B                                            | aldocb       | 4        | 1               | 57.024                       |
| F1QXG2       | tRNA selenocysteine 1-associated protein 1-like                               | trna1apl     | 4        | 4               | 623.54                       |
| Q90YC0       | Elongation factor 1-gamma                                                     | eef1g        | 4        | 4               | 146.46                       |
| Q7ZUP6       | Isocitrate dehydrogenase [NADP]                                               | idh2         | 4        | 4               | 245.43                       |
| Q9PVK4       | L-lactate dehydrogenase B-A chain                                             | ldhba        | 4        | 2               | 85.794                       |
| B2GSG5       | Serine/arginine-rich splicing factor 1A                                       | srsf1a       | 3        | 3               | 25.419                       |
| Q7ZVA6       | Eukaryotic initiation factor 4A-III                                           | eif4a3       | 3        | 3               | 58.463                       |
| Q7ZW18       | Calcium-transporting ATPase                                                   | atp2a2b      | 3        | 1               | 89.458                       |
| <b>F1QH8</b> | <b>Eukaryotic translation initiation factor 3 subunit K</b>                   | <b>eif3k</b> | <b>2</b> | <b>2</b>        | <b>68.055</b>                |
| F1QK71       | DNA helicase                                                                  | mcm5         | 2        | 2               | 34.892                       |
| Q4V918       | Proteasome subunit alpha type 5                                               | psma3        | 2        | 2               | 96.862                       |
| Q6P0I2       | Proteasome subunit alpha type 8                                               | psma8        | 2        | 2               | 73.168                       |
| B0R0S5       | Eukaryotic translation initiation factor 6                                    | eif6         | 2        | 2               | 47.902                       |
| Q7ZUG5       | 40S ribosomal protein S21                                                     | rps21        | 2        | 2               | 70.535                       |
| A5WWI6       | Profilin                                                                      | pfn2l        | 2        | 2               | 41.825                       |
| H8Y260       | 60S ribosomal protein L34                                                     | rpl34        | 2        | 2               | 114.17                       |
| Q0PWS0       | Adenosylhomocysteinase                                                        | ahcy         | 2        | 2               | 23.677                       |
| B7U3W3       | Annexin                                                                       | anxa4        | 2        | 2               | 121.33                       |
| Q6NV33       | Isocitrate dehydrogenase [NAD] subunit                                        | idh3a        | 1        | 1               | 29.873                       |
| P0CK98       | Coiled-coil domain-containing protein 39                                      | ccdc39       | 1        | 1               | 58.352                       |
| Q6NYS8       | Dolichyl-diphosphooligosaccharide--protein glycosyltransferase 48 kDa subunit | ddost        | 1        | 1               | 10.095                       |
| Q6DG54       | Pyruvate kinase                                                               | pkma         | 1        | 1               | 63.09                        |
| Q7ZV43       | Toll-interacting protein                                                      | tollip       | 1        | 1               | 18.996                       |

|        |                  |      |   |   |        |
|--------|------------------|------|---|---|--------|
| Q6P698 | Plastin-2        | lcp1 | 1 | 1 | 95.702 |
| Q7ZVY5 | Citrate synthase | cs   | 1 | 1 | 9.3652 |
